# Supplementary material for: Cell-Free DNA Extracted from CSF for the Molecular Diagnosis of Pediatric Embryonal Brain Tumors
Source: MDPI journal article supplement (doi:10.3390/cancers15133532), 2023-07-07
Supplement: s1 [file s1]

*Supplemental Materials*

# Cell-Free DNA Extracted from CSF for the Molecular Diagnosis of Pediatric Embryonal Brain Tumors

## Supplementary Materials

### S1. Supplementary Methods

#### Molecular analysis of primary tumors

Clinical molecular diagnosis of primary pediatric EBT involved array-CGH, targeted sequencing and/or Nanostring profiling, according to the tumor entity. Molecular subtyping and panel sequencing with an in-house panel were performed as described previously [1–3].

Whole-exome sequencing (WES) of genomic DNA extracted from primary tumors, and paired germline genomic DNA, was performed in 18 and 6 patients, respectively. WES was performed following either an Agilent SureSelect Human All Exon v5 or a Roche Nimblegen SeqCap EZ Exome V3 library construction and capture, as reported previously [4].

#### cfDNA extraction and quantification

cfDNA was extracted from approximately 500 µL (5–6 droplets) of CSF using QIAamp Circulating Nucleic Acid Kit (Qiagen) with the QiaVac24s system, according to the manufacturers' recommendation. cfDNA concentration was measured using a Qubit fluorometric assay (Invitrogen) with the dsDNA HS (High Sensitivity) Assay Kit [5]. The total cfDNA concentration per mL of CSF was calculated. Its quality was defined based on a bioanalyzer agilent 2100 (Agilent) analysis using the High Sensitivity DNA chip.

#### Library construction and exome capture of cfDNA

cfDNA sequencing libraries were constructed without fragmentation using the Accel-NGS 2S Hyb DNA Library Kit for Illumina™ from Swift Biosciences® according to the manufacturer's protocol, modified to 9-cycle PCR, and with the addition of a size selection step by Ampure XP™ beads to retain only the 160 bp fragments.

For whole exome capture, the Medexome Enrichment Kit (Nimblegen Roche Sequencing) was used according to the manufacturer's protocol. Paired-end (100 bp) Illumina™ WES was performed to an expected coverage of 100×.

#### Targeted sequencing panel design

For custom deep coverage targeted capture sequencing in order to infer expression based on the coverage of sequencing around the TSS, a panel was designed with NimbleDesign tools to cover EBT-relevant genes and their TSS. One hundred and twelve genes which contribute to the genetic classification of embryonic tumors such as *MYC* (in MB and ATRT MYC subtype), *MYCN* (in MB and ATRT SHH subtype), *TYR* (in ATRT TYR subtype) or *JAK3* are used for a diagnostic Nanostring panel design at Institut Curie[6–8]. The regions (+/- 1 kb) surrounding the TSS of these genes were included in the design for a panel to analyze CSF cfDNA. In addition, the coding sequences of six genes (*CTNNB1*, *PTCH1*, *SMARCB1*, *SMARCA4*, *SMO*, and *SUFU*) were added to enable the use for this panel for detection of driver mutation in these tumors, as well as five hotspots mutations of gliomas (*H3F3A\_K27M*, *HIST1H3B\_K27M*, *BRAF\_V600E*, *IDH1\_R132C* and *IDH2\_R172K*) [9,10]. Forty-four SNPs were also added for identity monitoring. For the prediction of expression, eight TSS were selected as controls, including four ubiquitously expressed genes with strong or moderate expression such as *ACTB*, *B2M*, *GAPDH* or *SDHA431*. Two

genes not expressed in the central nervous system (*BAGE4* and *ACPT*), and two genes expressed in the CNS (*SLC32A1* and *CNTNAP2*) were selected from the Protein Atlas database [11,12]. This panel design is referred to as the targeted sequencing TSS panel.

This targeted sequencing TSS panel was used either directly on cfDNA or for a second capture step on previously constructed and captured WES libraries. Following a double capture procedure, first of the whole exome followed by the targeted capture, target sequencing (PE 100 × 100 bp) was performed on all CSF samples on the Miseq V3 or Novaseq SP aiming for a theoretical coverage of 500x.

### Bioinformatics analysis:

#### Copy number and SNV analysis

The WES and target sequencing raw reads were mapped to the reference human genome assembly GRCh37/hg19 using BWA v0.7.15, with default parameters. The data were preprocessed for variant discovery according to GATK Best Practices for WES, and without duplicates removal for target sequencing.

Coverage scores were computed and normalized using deepTools bamCoverage function with CPM method respectively [13].

Variants were called with GATK 4.1.7.0 Mutect2 using Joint-Calling method. A minimum mapping and base quality of 20 was applied in each calling method. A panel of 200 normal germline samples and a germline resource from gnomAD (somatic-b37\_af-only-gnomad.raw.sites.vcf) was used to filter germline variants. The variants were annotated with SnpEff 5.0 (dbNSFP2.9.3, COSMIC v92, gnomAD r.2.1.1, clinvar\_20200824).

Only SNVs with a Moderate or High predicted impact were kept. Variants with a population prevalence of greater than 1/2,000, a coverage less than 20, a number of reads that match the variant fewer than 10, and variants that have no cosmicID or that are not predicted to be deleterious by at least 3/9 databases were filtered out. IGV v2.4.14 was used to generate SNV pictures and the IGVs were verified individually by visual inspection.

For targeted sequencing analysis, only results of calling by Mutect2 were considered given the small targeted regions. Unlike WES data analysis, no additional filter was applied. Copy number analyses were performed with snp-pileup\_0.5.14 and FACETS v0.5.11 applying a threshold of 20 for mapping and base quality. The option “un-match” was used for patients without a paired normal sample.

The ctDNA fraction in cfDNA was predicted using the Facets tool by using a matched normal sample whenever available and unmatched normal sample when no matched normal sample was available [14].

#### Sequencing across the TSS to infer expression profiles

The bigwig files containing the coverage scores representing the number of reads per bin size of 1 were generated with the option BAM coverage using BAM files [13]. Only fragments sized between 120pb and 180pb were kept. The MNase option was used to determine nucleosome position and extension of reads to fragment size was allowed. Only reads with mapping quality higher than 20 were kept. All duplicates were removed and the CPM (Counts Per Million mapped reads) method was used to normalize the number of reads per bin. Matrices with mean score per genomic region (-300/-1,000 bp downstream of the TSS and +300/+1,000 bp upstream of the TSS) were computed with the option computeMatrix and used as input for the option PlotProfile that allows to visualise the average read coverages over the genomic regions and also to the option plotHeatmap that allows the visualisation of the read coverages for genomic regions.

The window capture of the TSSs had a size of 2 kb around the TSS (-1 kb downstream and +1 kb upstream of the TSS) to include the nucleosome depleted region (NDR) and to observe the TSS footprint at this position. K-means clustering using deeptools, with the number of clusters set to 2, was used to classify genes based on the coverage across the TSS.

## References

1. Euskirchen P, Bielle F, Labreche K, Kloosterman WP, Rosenberg S, Daniau M, Schmitt C, Masliah-Planchon J, Bourdeaut F, Dehais C *et al*: **Same-day genomic and epigenomic diagnosis of brain tumors using real-time nanopore sequencing.** *Acta Neuropathol* 2017, **134**(5):691-703.
2. Passeri T, Dahmani A, Masliah-Planchon J, Naguez A, Michou M, El Botty R, Vacher S, Bouarich R, Nicolas A, Polivka M *et al*: **Dramatic In Vivo Efficacy of the EZH2-Inhibitor Tazemetostat in PBRM1-Mutated Human Chordoma Xenograft.** *Cancers (Basel)* 2022, **14**(6).
3. Richer W, Masliah-Planchon J, Clement N, Jimenez I, Maillot L, Gentien D, Albaud B, Chemlali W, Galant C, Larousserie F *et al*: **Embryonic signature distinguishes pediatric and adult rhabdoid tumors from other SMARCB1-deficient cancers.** *Oncotarget* 2017, **8**(21):34245-34257.
4. Berlanga P, Pierron G, Lacroix L, Chicard M, Adam de Beaumais T, Marchais A, Harttrampf AC, Iddir Y, Larive A, Soriano Fernandez A *et al*: **The European MAPPYACTS Trial: Precision Medicine Program in Pediatric and Adolescent Patients with Recurrent Malignancies.** *Cancer Discov* 2022, **12**(5):1266-1281.
5. Chicard M, Colmet-Daage L, Clement N, Danzon A, Bohec M, Bernard V, Baulande S, Bellini A, Deveau P, Pierron G *et al*: **Whole-Exome Sequencing of Cell-Free DNA Reveals Temporo-spatial Heterogeneity and Identifies Treatment-Resistant Clones in Neuroblastoma.** *Clin Cancer Res* 2018, **24**(4):939-949.
6. Sturm D, Orr BA, Toprak UH, Hovestadt V, Jones DTW, Capper D, Sill M, Buchhalter I, Northcott PA, Leis I *et al*: **New Brain Tumor Entities Emerge from Molecular Classification of CNS-PNETs.** *Cell* 2016, **164**(5):1060-1072.
7. Johann PD, Erkek S, Zapatka M, Kerl K, Buchhalter I, Hovestadt V, Jones DTW, Sturm D, Hermann C, Segura Wang M *et al*: **Atypical Teratoid/Rhabdoid Tumors Are Comprised of Three Epigenetic Subgroups with Distinct Enhancer Landscapes.** *Cancer Cell* 2016, **29**(3):379-393.
8. Ramaswamy V, Remke M, Bouffet E, Faria CC, Perreault S, Cho YJ, Shih DJ, Luu B, Dubuc AM, Northcott PA *et al*: **Recurrence patterns across medulloblastoma subgroups: an integrated clinical and molecular analysis.** *Lancet Oncol* 2013, **14**(12):1200-1207.
9. Behling F, Schittenhelm J: **Oncogenic BRAF Alterations and Their Role in Brain Tumors.** *Cancers (Basel)* 2019, **11**(6).
10. Wu G, Diaz AK, Paugh BS, Rankin SL, Ju B, Li Y, Zhu X, Qu C, Chen X, Zhang J *et al*: **The genomic landscape of diffuse intrinsic pontine glioma and pediatric non-brainstem high-grade glioma.** *Nat Genet* 2014, **46**(5):444-450.
11. Consortium GT: **The Genotype-Tissue Expression (GTEx) project.** *Nat Genet* 2013, **45**(6):580-585.
12. Lizio M, Harshbarger J, Shimoji H, Severin J, Kasukawa T, Sahin S, Abugessaisa I, Fukuda S, Hori F, Ishikawa-Kato S *et al*: **Gateways to the FANTOM5 promoter level mammalian expression atlas.** *Genome Biol* 2015, **16**(1):22.
13. Ramirez F, Ryan DP, Gruning B, Bhardwaj V, Kilpert F, Richter AS, Heyne S, Dundar F, Manke T: **deepTools2: a next generation web server for deep-sequencing data analysis.** *Nucleic Acids Res* 2016, **44**(W1):W160-165.
14. Shen R, Seshan VE. **FACETS: allele-specific copy number and clonal heterogeneity analysis tool for high-throughput DNA sequencing.** *Nucleic Acids Res* 2016 **44**(16):e131

## 2. Supplementary Figures

### Supplementary Figure S1

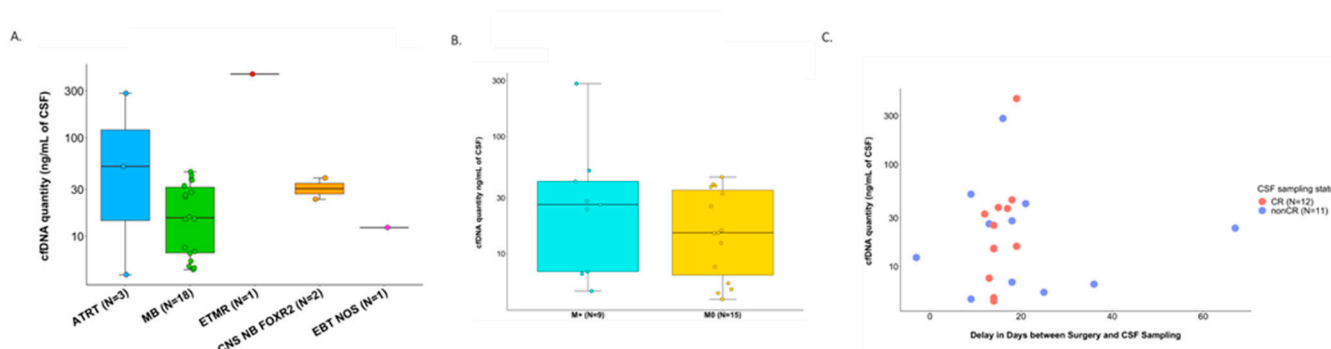

**Supplementary Figure S1:** cfDNA concentrations extracted from 5 – 6 droplets CSF, quantified per mL of CSF. A. cfDNA concentrations depending on the disease type. B. cfDNA concentrations depending on disease status. C. cfDNA concentrations depending on time between surgery of the primary tumor and CSF collection. Disease status at time of CSF sampling: CR, complete remission (red); nonCR, not in complete remission (blue). No correlation between cfDNA concentration and disease entity, disease status (localised versus metastatic), or time between surgery and CSF collection could be observed.

### Supplementary Figure S2

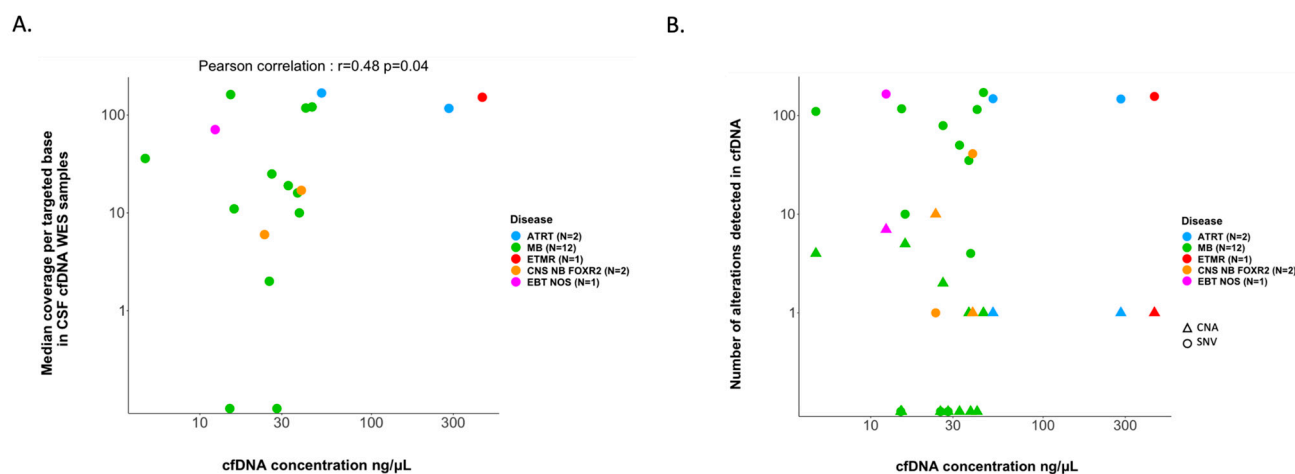

**Supplementary Figure S2:** A. Median coverage per targeted base in CSF WES sample according to the cfDNA concentration. Pearson test shows significant correlation ( $r=0.48$ ,  $p=0.04$ ). B. Number of CNAs and SNVs according to the cfDNA concentration. Pearson test shows no significant correlation ( $r=0.2$ ,  $p=0.1$ ).

## Supplementary Figure S3

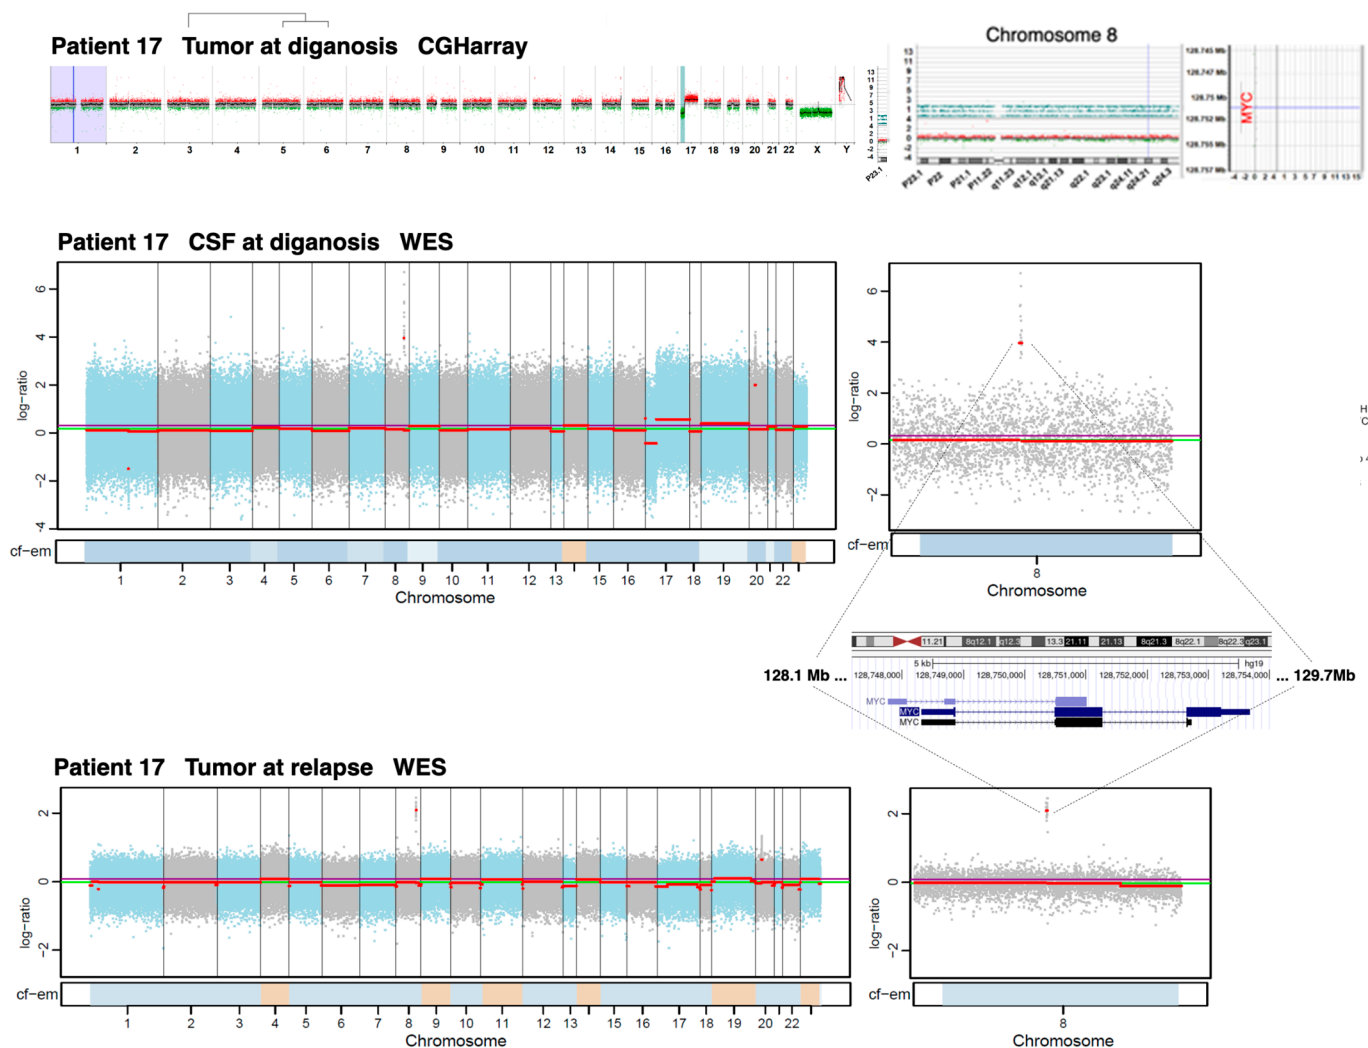

**Supplementary Figure S3:** CSF cfDNA copy number analysis reveals a *MYC* amplification not seen in the analysis of the primary tumor at diagnosis, but in the tumor at the time of relapse (patient 17, with a diagnosis of MB). A. aCGH on DNA extracted from the primary tumor at diagnosis, showing a dynamic copy number profile, with loss of chr 17p, and gain of chr 17q, but no *MYC* amplification. B. Copy number profile by WES on CSF cfDNA reveals a *MYC* amplification, in addition to 17p loss/17q gain. C. At relapse, WES on the recurrent tumor reveals *MYC* amplification. These findings indicate clonal heterogeneity, with the *MYC* amplification most likely not present in the cells analyzed in the primary tumor sample at diagnosis, but contributing to the relapse.

## Supplementary Figure S4

**Supplementary Figure S4:** Clustering on the total 112 NDR regions of the capture in the seven samples for which the k-means clustering of genes into two groups was informative. Hierarchical clustering was performed on NDR and on samples.

**Supplementary Table S1a: Clinical and biological characteristics of 25 pediatric patients with embryonal brain tumors.** Detailed clinical information, and follow up. Biological analyses performed on primary tumor and CSF cfDNA are indicated. Abbreviations : m, months; d, days; M, Metastasis; NA , not applicable; MD , missing data; FU, follow-up; CR, complete remission; PR , partial remission; PD, progressive disease; DOD, dead of disease

| Patient Number | Age at diagnosis (m) | Pathological Diagnosis | Molecular group           | Localisation                                 | M  | Tumor molecular analysis | CSF molecular analysis | Surgery results      | CSF Cytological examination           | Delay - surgery to CSF sampling (d) | status at CSF sampling | Treatment/ protocol       | Occurrence of relapse | Disease status at last FU | FU duration (m) |
|----------------|----------------------|------------------------|---------------------------|----------------------------------------------|----|--------------------------|------------------------|----------------------|---------------------------------------|-------------------------------------|------------------------|---------------------------|-----------------------|---------------------------|-----------------|
| 1              | 93,3                 | ATRT                   | ATRT_SHH                  | posterior fossa                              | M+ | at diagnosis             | at diagnosis           | incomplete resection | negative                              | 16                                  | nonCR                  | ATRT DFCI                 | no                    | CR                        | 35,23           |
| 2              | 15,9                 | ATRT                   | ATRT_MYC                  | supra-tentorial, frontal                     | M+ | at diagnosis             | at diagnosis           | incomplete resection | negative                              | 9                                   | nonCR                  | EU-RHAB, then MEMMAT-like | no                    | PR                        | 31,80           |
| 3              | 6,2                  | ATRT                   | not done/not contributive | posterior fossa                              | M0 | at diagnosis             | at diagnosis           | incomplete resection | MD                                    | MD                                  | nonCR                  | ATRT09                    | no                    | DOD                       | 8,37            |
| 4              | 65,1                 | Medulloblastoma        | Group 4                   | posterior fossa                              | M3 | at diagnosis             | at diagnosis           | incomplete resection | negative                              | 18                                  | nonCR                  | PNETHR+5                  | no                    | CR                        | 123,37          |
| 5              | 105,3                | Medulloblastoma        | WNT                       | posterior fossa                              | M0 | at diagnosis             | at diagnosis           | complete resection   | negative                              | 18                                  | CR                     | M-SFOP 2007               | no                    | CR                        | 125,07          |
| 6              | 109,0                | Medulloblastoma        | not done/not contributive | posterior fossa                              | M0 | at diagnosis             | at diagnosis           | complete resection   | negative                              | 15                                  | CR                     | PNET4                     | no                    | CR                        | 100,00          |
| 7              | 204,8                | Medulloblastoma        | not done/not contributive | posterior fossa                              | M0 | at diagnosis             | at diagnosis           | complete resection   | negative                              | 12                                  | CR                     | hybride                   | no                    | CR                        | 100,00          |
| 8              | 35,5                 | CNS NB FOXR2           | not done/not contributive | supratentorial, right temporoparietal region | M3 | at diagnosis             | at diagnosis           | incomplete resection | after chemotherapy : 2 atypical cells | 67                                  | nonCR                  | hybride                   | yes                   | DOD                       | 13,53           |
| 9              | 141,3                | Medulloblastoma        | Group 4                   | posterior fossa                              | M0 | at diagnosis             | at diagnosis           | complete resection   | negative                              | 14                                  | CR                     | MSFOP 2007                | no                    | CR                        | 86,43           |
| 10             | 59,3                 | Medulloblastoma        | NonWNT/nonSHH             | posterior fossa                              | M0 | at diagnosis             | at diagnosis           | complete resection   | negative                              | 19                                  | CR                     | PNETHR+5                  | no                    | CR                        | 97,93           |

|    |       |                           |                                 |                 |    |              |              |                                  |          |    |       |            |     |     |       |
|----|-------|---------------------------|---------------------------------|-----------------|----|--------------|--------------|----------------------------------|----------|----|-------|------------|-----|-----|-------|
| 11 | 347,5 | Medulloblastoma           | SHH                             | posterior fossa | M0 | at diagnosis | at diagnosis | complete resection               | negative | 14 | CR    | RSMA       | no  | CR  | 75,13 |
| 12 | 84,9  | Medulloblastoma           | WNT                             | posterior fossa | M0 | at diagnosis | at diagnosis | complete resection               | negative | 17 | CR    | PNET5-like | no  | CR  | 65,43 |
| 13 | 122,6 | Medulloblastoma           | NonWnt/NonSHH                   | posterior fossa | M+ | at diagnosis | at diagnosis | incomplete resection             | positive | 13 | nonCR | PNET HR+5  | no  | CR  | 66,23 |
| 14 | 410,5 | Medulloblastoma           | not done/not contributive       | posterior fossa | M+ | at diagnosis | at diagnosis | incomplete resection             | suspect  | 21 | nonCR | PNET HR+5  | no  | CR  | 62,57 |
| 15 | 47,1  | Medulloblastoma           | Group 3                         | posterior fossa | M+ | at diagnosis | at diagnosis | incomplete resection             | negative | 18 | nonCR | HRMB-5     | yes | PD  | 62,23 |
| 16 | 186,8 | Medulloblastoma           | Group 3                         | posterior fossa | M0 | at diagnosis | at diagnosis | complete resection               | negative | 14 | CR    | PNET5      | no  | CR  | 52,20 |
| 17 | 82,5  | Medulloblastoma           | Group4                          | posterior fossa | M+ | at relapse   | at diagnosis | incomplete resection             | positive | 9  | nonCR | PNET HR+5  | yes | DOD | 27,27 |
| 18 | 140,5 | Medulloblastoma           | Group 4                         | posterior fossa | M0 | at diagnosis | at diagnosis | complete resection               | negative | 14 | CR    | PNET5      | no  | CR  | 32,50 |
| 19 | 111,8 | Medulloblastoma           | Group 4                         | posterior fossa | M0 | at diagnosis | at diagnosis | complete resection               | negative | 13 | CR    | PNET5      | no  | CR  | 30,27 |
| 20 | 140,0 | Medulloblastoma           | WNT                             | posterior fossa | M0 | at diagnosis | at diagnosis | complete resection               | negative | 14 | CR    | PNET5      | no  | CR  | 34,70 |
| 21 | 172,3 | Medulloblastoma           | Group 4                         | posterior fossa | M0 | at diagnosis | at diagnosis | incomplete resection             | negative | 25 | nonCR | PNET HR+5  | yes | DOD | 17,90 |
| 22 | 58,3  | Medulloblastoma           | Group 3                         | posterior fossa | M+ | at diagnosis | at diagnosis | complete resection               | positive | 36 | nonCR | PNET HR+5  | no  | CR  | 45,83 |
| 23 | 40,1  | ETMR                      | ETMR                            | MD              | MD | at diagnosis | at diagnosis | complete resection               | negative | 19 | CR    | PNET HR-5  | yes | DOD | 19,77 |
| 24 | 63,6  | CNS NB FOXR2              | NB-FOXR2                        | posterior fossa | M0 | at relapse   | at relapse   | complete resection               | MD       | MD |       | other      | yes |     |       |
| 25 | 39,9  | Embryonic brain tumor NOS | Malignant plexus cho-roid tumor | supratento-rial | M0 | at diagnosis | at diagnosis | complete resection (2nd surgery) | negative | -3 | nonCR | PNET HR+5  | yes | DOD | 15,93 |



**Supplementary Table S1b : Results of CSF cfDNA analysis**

Abbreviations PT, primary tumor; GL, germline analysis A, Total number of WES SNV in tumor; B, Number of WES SNVs common to tumor and CSF cfDNA; C, Number of WES SNV in tumor but not in CSF cfDNA; D, Number of WES SNV in CSF cfDNA but not in tumor; E, Number of SNV in tumor WES not covered in CSF cfDNA WES; F, Number of SNV in CSF cfDNA WES not covered in tumor WES; G, Total number of SNV in CSF cfDNA (WES); neccc, not enough coverage in CSF cfDNA. The ctDNA fraction in cfDNA was predicted using the Facets tool [14] by using a matched normal sample whenever available \* and unmatched normal sample when no matched normal sample was available.

| Patient number | CSF cfDNA concentration (ng/ml) | ctDNA fraction in cfDNA | GL  | PT data type | CSF cfDNA : data type | CNA PT analysis : contributivity | CNA CSF cfDNA: contributivity | SNV PT : contributivity | SNV CSF cfDNA : contributivity | A   | B     | C     | D     | E   | F  | G   | CSFcfDNA target seq TSS: Deeptools Kmeans | CSF cfDNA target seq TSS: Mean coverage |
|----------------|---------------------------------|-------------------------|-----|--------------|-----------------------|----------------------------------|-------------------------------|-------------------------|--------------------------------|-----|-------|-------|-------|-----|----|-----|-------------------------------------------|-----------------------------------------|
| 1              | 282.7                           | 0.23*                   | Yes | WES          | WES/ target seq       | Yes                              | Yes                           | Yes                     | Yes                            | 153 | 134   | 15    | 4     | 4   | 9  | 147 | informative                               | 311                                     |
| 2              | 51.2                            | 0.3*                    | Yes | WES          | WES/ target seq       | Yes                              | Yes                           | Yes                     | Yes                            | 156 | 143   | 11    | 5     | 2   | 0  | 148 | informative                               | 628                                     |
| 3              | 4.08                            | NA                      | NA  | panel        | target seq            | NA                               | NA                            | Yes                     | NA                             | NA  | NA    | NA    | NA    | NA  | NA | NA  | non-informative                           | 7                                       |
| 4              | 28.1                            | <0.15                   | NA  | WES          | WES                   | Yes                              | No                            | Yes                     | No                             | 161 | neccc | neccc | neccc | 161 | 0  | 0   | NA                                        |                                         |
| 5              | 45.06                           | <0.15                   | NA  | WES          | WES/ target seq       | Yes                              | Yes                           | Yes                     | Yes                            | 183 | 160   | 22    | 11    | 1   | 0  | 171 | informative                               | 331                                     |
| 6              | 37.98                           | <0.15                   | NA  | WES          | WES                   | Yes                              | No                            | Yes                     | Yes                            | 145 | 4     | 8     | 0     | 133 | 0  | 4   | NA                                        |                                         |
| 7              | 32.73                           | <0.15                   | NA  | WES          | WES                   | Yes                              | No                            | Yes                     | Yes                            | 141 | 47    | 31    | 3     | 63  | 0  | 50  | NA                                        |                                         |
| 8              | 23.8                            | <0.15                   | NA  | WES          | WES                   | Yes                              | Yes                           | Yes                     | Yes                            | 141 | 1     | 1     | 0     | 139 | 0  | 1   | NA                                        |                                         |
| 9              | 25.38                           | <0.15                   | NA  | WES          | WES                   | Yes                              | No                            | Yes                     | No                             | 136 | neccc | neccc | neccc | 136 | 0  | 0   | NA                                        |                                         |
| 10             | 15.82                           | <0.15                   | NA  | WES          | WES                   | Yes                              | Yes                           | Yes                     | Yes                            | 157 | 10    | 11    | 0     | 136 | 0  | 10  | NA                                        |                                         |
| 11             | 14.93                           | <0.15                   | NA  | WES          | WES                   | Yes                              | No                            | Yes                     | No                             | 225 | neccc | neccc | neccc | 225 | 0  | 0   | NA                                        |                                         |
| 12             | 37.1                            | <0.15                   | NA  | WES          | WES                   | Yes                              | Yes                           | Yes                     | Yes                            | 134 | 35    | 14    | 0     | 85  | 0  | 35  | NA                                        |                                         |
| 13             | 26.25                           | <0.15                   | NA  | WES          | WES                   | Yes                              | Yes                           | Yes                     | Yes                            | 145 | 78    | 31    | 1     | 36  | 0  | 79  | NA                                        |                                         |
| 14             | 41.42                           | 0.48                    | NA  | WES          | WES/ target seq       | Yes                              | No                            | Yes                     | Yes                            | 170 | 107   | 62    | 6     | 1   | 2  | 115 | informative                               | 218                                     |
| 15             | 7.04                            | NA                      | NA  | panel        | target seq            | No                               | NA                            | Yes                     | NA                             | NA  | NA    | NA    | NA    | NA  | NA | NA  | non-informative                           | 4                                       |
| 16             | 4.6                             | NA                      | NA  | panel        | target seq            | Yes                              | NA                            | Yes                     | NA                             | NA  | NA    | NA    | NA    | NA  | NA | NA  | non-informative                           | 16                                      |
| 17             | 4.8                             | 0.37*                   | Yes | WES          | WES/ target seq       | Yes                              | Yes                           | Yes                     | Yes                            | 122 | 99    | 13    | 6     | 10  | 5  | 110 | non-informative                           | 142                                     |
| 18             | 15.1                            | <0.15*                  | Yes | WES/         | WES/                  | Yes                              | No                            | Yes                     | Yes                            | 108 | 100   | 8     | 15    | 0   | 2  | 117 | informative                               | 478                                     |



|    |        |       |     |       |                    |     |     |     |     |     |     |    |    |    |    |     |                 |     |
|----|--------|-------|-----|-------|--------------------|-----|-----|-----|-----|-----|-----|----|----|----|----|-----|-----------------|-----|
|    |        |       |     | panel | target seq         |     |     |     |     |     |     |    |    |    |    |     |                 |     |
| 19 | 7.7    | NA    | NA  | panel | target seq         | Yes | NA  | Yes | NA  | NA  | NA  | NA | NA | NA | NA | NA  | non-informative | 13  |
| 20 | 4.96   | NA    | NA  | panel | target seq         | Yes | NA  | Yes | NA  | NA  | NA  | NA | NA | NA | NA | NA  | non-informative | 10  |
| 21 | 5.6    | NA    | NA  | panel | target seq         | Yes | NA  | Yes | NA  | NA  | NA  | NA | NA | NA | NA | NA  | non-informative | 19  |
| 22 | 6.72   | NA    | NA  | panel | target seq         | Yes | NA  | Yes | NA  | NA  | NA  | NA | NA | NA | NA | NA  | non-informative | 5   |
| 23 | 442.75 | NA    | NA  | WES   | WES/<br>target seq | Yes | Yes | Yes | Yes | 149 | 131 | 16 | 25 | 2  | 0  | 156 | informative     | 594 |
| 24 | 39.03  | 0.25* | Yes | WES   | WES                | Yes | Yes | Yes | Yes | 132 | 37  | 20 | 1  | 75 | 3  | 41  | NA              |     |
| 25 | 12.27  | 0.86* | Yes | WES   | WES/t<br>arget seq | Yes | Yes | Yes | Yes | 165 | 153 | 10 | 4  | 2  | 8  | 165 | informative     | 142 |

**Supplementary Table S2: Quality control, WES.** For WES the sequencing coverage and quality statistics for each sample are summarized in Supplementary Table 2. The reference genome assembly GRCh37 was used to map the reads.

| Sample ID       | Total number of sequenced reads | Total number of uniquely mapped non-duplicate reads | Total number of covered bases | Median coverage (and range) per base | Percentage of targeted bases with coverage $\geq 10$ |
|-----------------|---------------------------------|-----------------------------------------------------|-------------------------------|--------------------------------------|------------------------------------------------------|
| Patient1_Tumor  | 260033903                       | 220615451                                           | 12183244282                   | 214 (0-9389)                         | 97.2 %                                               |
| Patient2_Tumor  | 296520478                       | 171159112                                           | 12260403193                   | 228 (0-8987)                         | 99.9 %                                               |
| Patient4_Tumor  | 136881215                       | 117621447                                           | 8103125357                    | 144 (0-6439)                         | 99.7 %                                               |
| Patient5_Tumor  | 117855631                       | 92992148                                            | 6549460078                    | 103 (0-3204)                         | 99.5 %                                               |
| Patient6_Tumor  | 158413365                       | 138393034                                           | 9699137817                    | 182 (0-4357)                         | 99.5 %                                               |
| Patient7_Tumor  | 138778280                       | 116335272                                           | 8081268705                    | 148 (0-5257)                         | 99.6 %                                               |
| Patient8_Tumor  | 97630544                        | 82598599                                            | 5732707808                    | 108 (0-2775)                         | 99.1 %                                               |
| Patient9_Tumor  | 119476092                       | 91435973                                            | 6419339389                    | 118 (0-5357)                         | 99.6 %                                               |
| Patient10_Tumor | 99334977                        | 84144656                                            | 5909401786                    | 105 (0-5727)                         | 99.3 %                                               |
| Patient11_Tumor | 143762885                       | 118218123                                           | 8390405723                    | 154 (0-3756)                         | 99.5 %                                               |
| Patient12_Tumor | 149866333                       | 80040781                                            | 5582712151                    | 104 (0-3576)                         | 99.1 %                                               |
| Patient13_Tumor | 127969900                       | 66563229                                            | 4699904836                    | 88 (0-4808)                          | 99.1 %                                               |
| Patient14_Tumor | 143967988                       | 120331916                                           | 8747134118                    | 163 (0-7814)                         | 99.4 %                                               |
| Patient17_Tumor | 277249764                       | 238603928                                           | 12961800779                   | 230 (0-11851)                        | 97.3 %                                               |
| Patient18_Tumor | 216520237                       | 61476520                                            | 4009446709                    | 81 (0-3208)                          | 99.8 %                                               |
| Patient23_Tumor | 159888987                       | 134820579                                           | 9538820722                    | 182 (0-4092)                         | 99.4 %                                               |
| Patient24_Tumor | 203466454                       | 179035447                                           | 9939727278                    | 182 (0-12856)                        | 95.4 %                                               |
| Patient25_Tumor | 181915814                       | 153363552                                           | 9030624979                    | 153 (0-16933)                        | 96.6 %                                               |
| Patient1_CSF    | 206811704                       | 94804735                                            | 5921092816                    | 117 (0-3476)                         | 99.9 %                                               |
| Patient2_CSF    | 204757080                       | 127305642                                           | 8787334419                    | 168 (0-5957)                         | 99.9 %                                               |

|               |           |           |            |              |        |
|---------------|-----------|-----------|------------|--------------|--------|
| Patient4_CSF  | 11293457  | 824750    | 39196230   | 0 (0-73)     | 0.2 %  |
| Patient5_CSF  | 117231304 | 95355287  | 6494217020 | 121 (0-4127) | 99.4 % |
| Patient6_CSF  | 148514872 | 11102521  | 534327825  | 10 (0-927)   | 52.8 % |
| Patient7_CSF  | 280311962 | 20418395  | 975031735  | 19 (0-1564)  | 89.1 % |
| Patient8_CSF  | 106737549 | 7875548   | 350336110  | 6 (0-613)    | 26.5 % |
| Patient9_CSF  | 34538873  | 2605394   | 105880859  | 2 (0-186)    | 1.1 %  |
| Patient10_CSF | 164484994 | 12300090  | 579074976  | 11 (0-1579)  | 60.8 % |
| Patient11_CSF | 5562952   | 453824    | 18225913   | 0 (0-302)    | 0.1 %  |
| Patient12_CSF | 80758010  | 13130234  | 813768394  | 16 (0-912)   | 83.4 % |
| Patient13_CSF | 107550453 | 19789478  | 1252420522 | 25 (0-2028)  | 95.6 % |
| Patient14_CSF | 124273645 | 106480569 | 6319973508 | 118 (0-6919) | 99.4 % |
| Patient17_CSF | 242702066 | 30637456  | 1815483492 | 36 (0-2804)  | 98.9 % |
| Patient18_CSF | 278477501 | 128808664 | 8837252109 | 162 (0-4452) | 99.9 % |
| Patient23_CSF | 144374376 | 121295553 | 8043794344 | 152 (0-3433) | 98.9 % |
| Patient24_CSF | 253242260 | 19031640  | 900290161  | 17 (0-1718)  | 83.5 % |
| Patient25_CSF | 222242005 | 56674264  | 3677216188 | 71 (0-5909)  | 99.6 % |

**Supplementary Table S3: Quality control, Targeted sequencing panel.** For targeted sequencing panel analysis, the sequencing coverage and quality statistics for each sample are summarized in Supplementary Table 3. The reference genome assembly GRCh37 was used to map the reads.

| Sample ID     | Total number of sequenced reads | Total number of uniquely mapped non-duplicate reads | Total number of covered targeted bases | Median coverage (and range) per targeted base | Percentage of targeted bases with coverage $\geq 200$ |
|---------------|---------------------------------|-----------------------------------------------------|----------------------------------------|-----------------------------------------------|-------------------------------------------------------|
| Patient1_CSF  | 109051890                       | 1631458                                             | 16054877                               | 330 (7-960)                                   | 93.1 %                                                |
| Patient2_CSF  | 109409168                       | 2864393                                             | 35833589                               | 782 (4-1978)                                  | 96.3 %                                                |
| Patient3_CSF  | 7687154                         | 37040                                               | 416294                                 | 7 (0-278)                                     | 0.2 %                                                 |
| Patient5_CSF  | 4207467                         | 1445105                                             | 20741148                               | 447 (0-812)                                   | 91.7 %                                                |
| Patient14_CSF | 3986259                         | 971701                                              | 13618344                               | 297 (0-514)                                   | 84.8 %                                                |
| Patient15_CSF | 3998057                         | 24149                                               | 262958                                 | 5 (0-46)                                      | 0 %                                                   |
| Patient16_CSF | 32003917                        | 86323                                               | 871059                                 | 16 (0-279)                                    | 0.2 %                                                 |
| Patient17_CSF | 198291143                       | 697823                                              | 6337765                                | 121 (0-2115)                                  | 7.9 %                                                 |
| Patient18_CSF | 172295141                       | 2471517                                             | 25269567                               | 524 (1-2165)                                  | 96.4 %                                                |
| Patient19_CSF | 16923700                        | 74033                                               | 741372                                 | 14 (0-273)                                    | 0.2 %                                                 |
| Patient20_CSF | 12390628                        | 49882                                               | 536426                                 | 10 (0-149)                                    | 0 %                                                   |
| Patient21_CSF | 40811654                        | 109722                                              | 1113900                                | 20 (0-483)                                    | 0.4 %                                                 |
| Patient22_CSF | 3319548                         | 22915                                               | 283564                                 | 5 (0-291)                                     | 0.1 %                                                 |
| Patient23_CSF | 4732199                         | 2466168                                             | 39428138                               | 854 (0-1952)                                  | 92.8 %                                                |
| Patient25_CSF | 129290153                       | 658545                                              | 6911980                                | 133 (1-1278)                                  | 13.4 %                                                |
